# Supplementary material
Source: publisher figshare collection journal article supplement (https://sage.figshare.com/ndownloader/files/15778877)

## RCRT Clinical Assessment - Grading Compensations

Evaluate on the *motion* to place clothespin properly, not at a single point in time. Motion is observed in the frontal plane. Lowest grade is recorded. Grades are from 1-4 (Excessive to No Compensation). Grade 1 for incorrect order. Midline is defined as the line of intersection of the frontal and sagittal plane.

### Trunk Lateral Tilt (Evaluate on Placement of 1<sup>st</sup> and 2<sup>nd</sup> Clothespin for Upward)

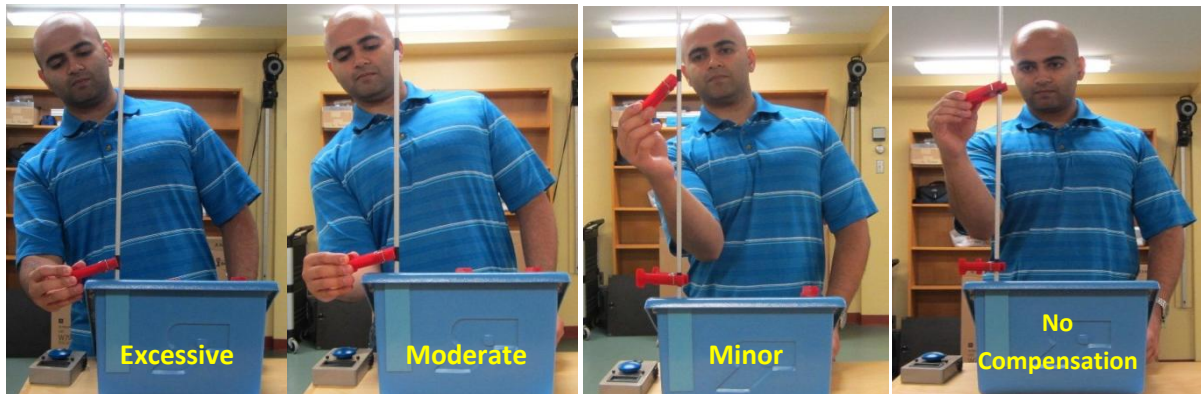

1. Excessive – Lateral movement of subject's sternum crosses vertical rod OR medial movement of elbow crosses subject's midline OR excessive leg movement (knee bending/rotation).

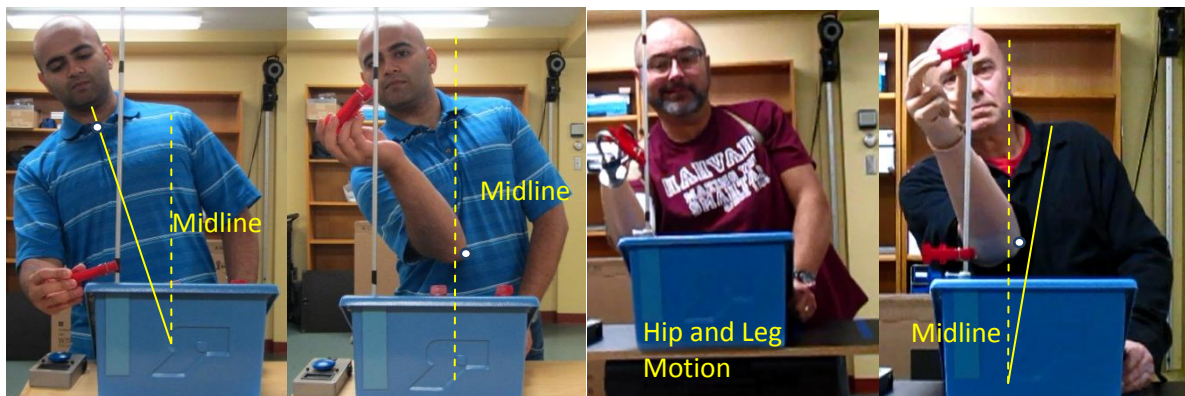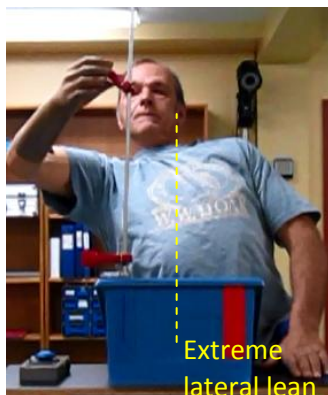

2. Moderate – Subject’s sternum is close to vertical rod due to excessive tilt OR elbow comes near to subject’s midline, but does not cross OR moderate leg movement (knee bending/rotation).

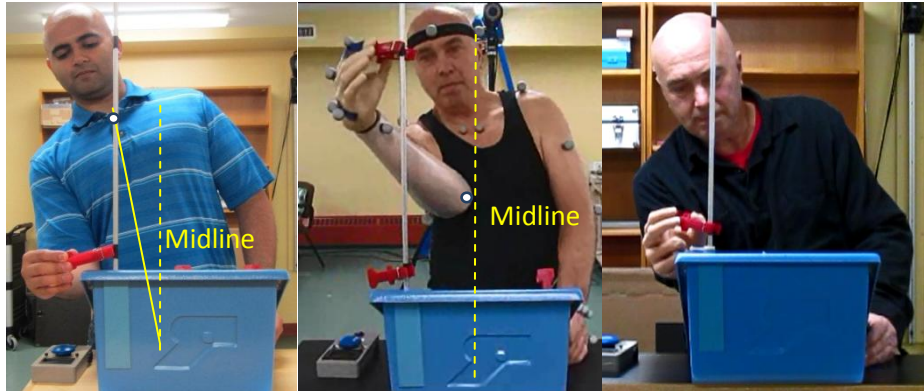

3. Minor – Minimal trunk lateral tilt OR elbow sufficiently away from midline of subject.

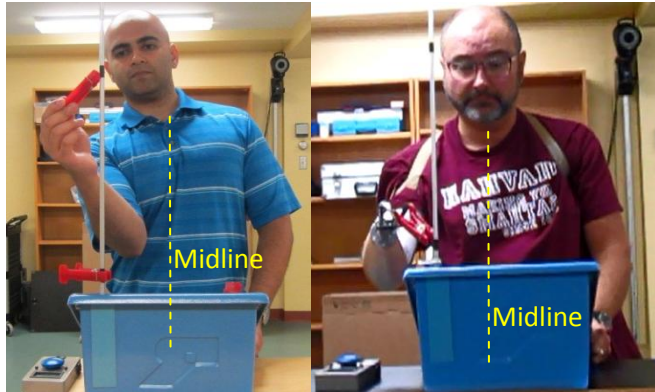

4. No Compensation - No awkwardness or compensatory motion. Equivalent to non-disabled.

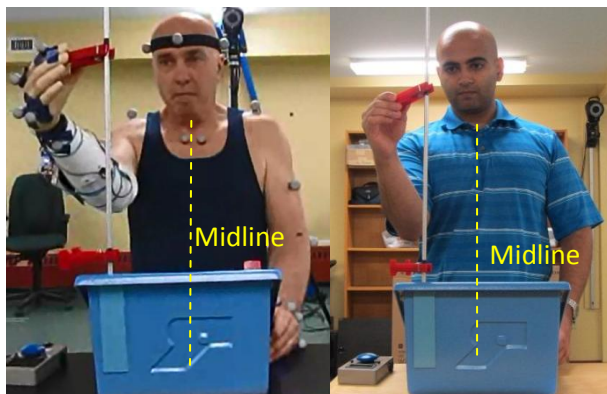

**Shoulder Abduction (Evaluate on Placement of 3<sup>rd</sup> Clothespin for Downward)**

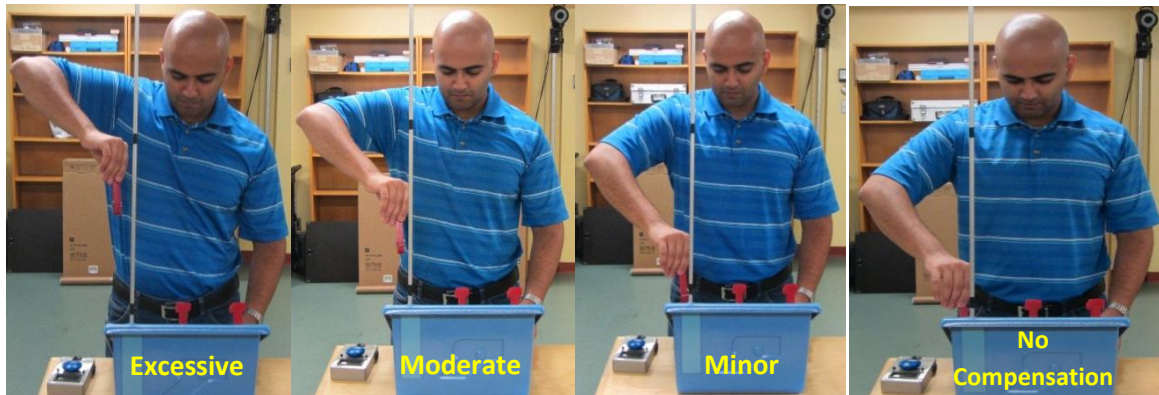

1. Excessive –Shoulder abduction (elbow height) exceeds  $90^\circ$  at any point during placement or excessive leg movement (knee bending/rotation). Vertex of angle is sternoclavicular joint, not glenohumeral joint.

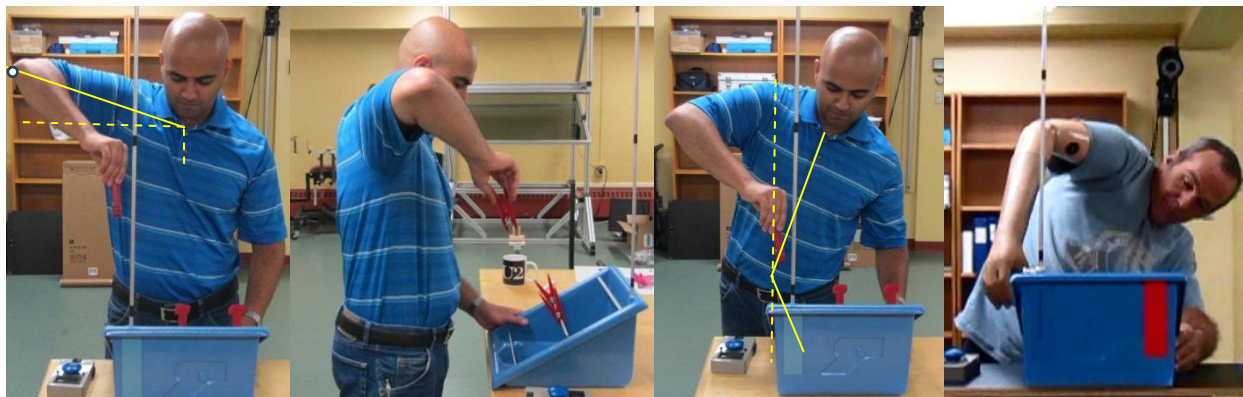

2. Moderate – Elbow height close to, but does not exceed height of collar bone, angle stays under  $90^\circ$

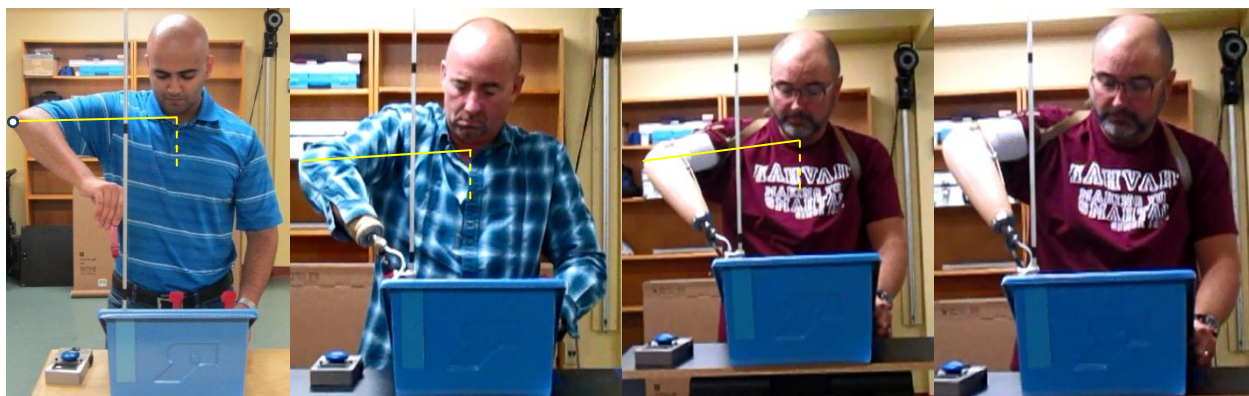

3. Minor – Shoulder abduction angle in frontal plane greater than 60°, less than 80°

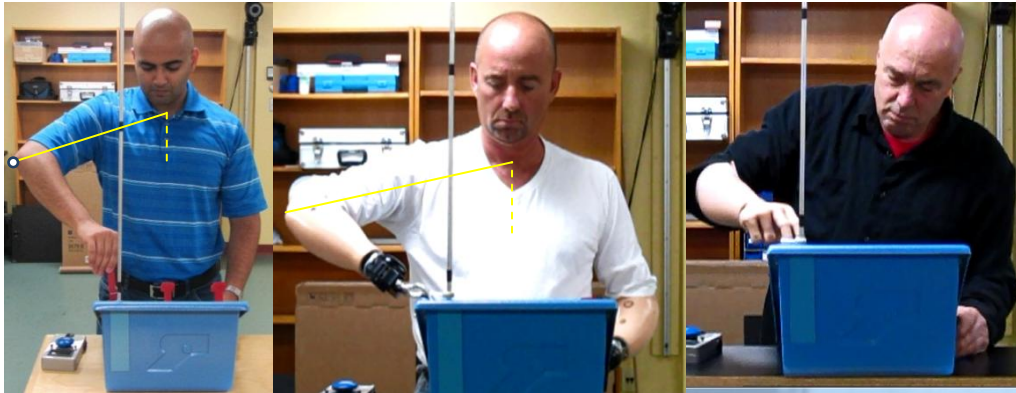

4. No Compensation - Abduction angle less than 60 degrees in frontal plane. Equivalent to non-disabled.

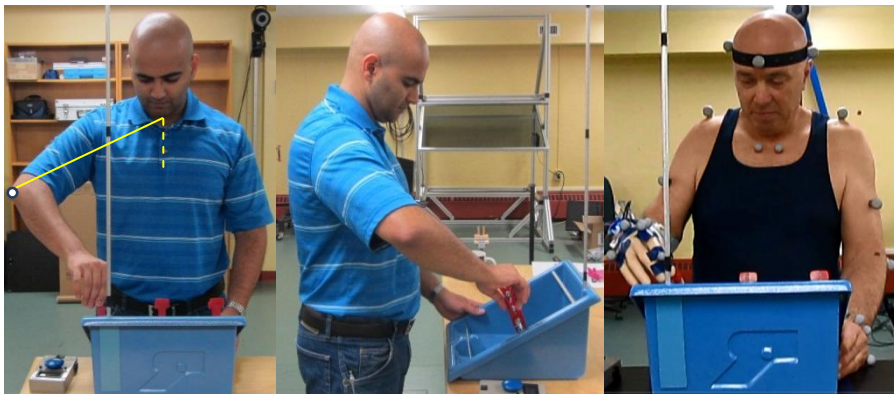

Supplement: Supplementary file 1 [file 15778877]
